# Supplementary material for: Dynamics of Physicochemical Properties, Flavor, and Microbial Communities of Salt-Free Bamboo Shoots during Natural Fermentation: Correlation between Microorganisms and Metabolites
Source: MDPI journal article supplement (doi:10.3390/fermentation9080733), 2023-08-06
Supplement: s1 [file s1]

## Supplementary data

**Table S1** Volatile compounds of sour bamboo shoots during fermentation measure by GC-MS.

| NO.      | Volatile components                                                           | Relative content (µg/L) |             |              |                |               |              |
|----------|-------------------------------------------------------------------------------|-------------------------|-------------|--------------|----------------|---------------|--------------|
|          |                                                                               | 1d                      | 7d          | 14d          | 21d            | 28d           | 60d          |
| Alcohols |                                                                               |                         |             |              |                |               |              |
| 1        | 1-Heptanol                                                                    | -                       | -           | 2.68±0.00c   | 3.42±0.19b     | -             | 6.25±0.00a   |
| 2        | 1-Hexanol, 2-ethyl-                                                           | 7.39 ±0.00b             | -           | 7.00±1.11bc  | 12.94±0.00a    | 7.34±0.00bc   | 5.49±0.71c   |
| 3        | 2-Octen-1-ol, (E)-                                                            | -                       | 4.39±1.08b  | -            | -              | -             | 6.01 ±0.00a  |
| 4        | 1-Octanol                                                                     | 5.11±0.72b              | 13.04±2.72b | 16.30±3.08ab | 14.01±1.50b    | 20.39±8.45ab  | 32.07±6.16a  |
| 5        | Linalool                                                                      | 7.81±1.5bc              | -           | 6.77±0.25c   | 12.57±3.00a    | 11.07±2.92ab  | -            |
| 6        | Cyclohexanol, 5-methyl-2-(1-methylethyl)-, (1.alpha.,2.beta.,5.alpha.)-(./-)- | -                       | -           | 1.55±0.22b   | 0.82±0.00c     | 0.59±0.00d    | 3.08±0.00a   |
| 7        | 10-Undecen-1-ol                                                               | -                       | 4.62±1.51c  | 2.38±0.00d   | 6.34±0.14b     | -             | 11.31±0.00a  |
| 8        | 3,6-Nonadien-1-ol, (E,Z)-                                                     | 2.54±0.23a              | 60.9±28.7a  | 49.27±30.48a | 56.14±6.36a    | 91.44±87.48a  | 93.96±39.21a |
| 9        | 1-Decanol                                                                     | -                       | 1.69±0.62a  | 3.21±1.51a   | 3.08±1.35a     | -             | 6.16±6.86a   |
| 10       | [1,1'-Biphenyl]-2,3'-diol, 3,4',5,6'-tetrakis(1,1-dimethylethyl)-1            | 7.21±1.64ab             | 2.54±1.59b  | 6.93±4.33ab  | 6.09±3.25ab    | 3.58±0.68b    | 14.65±8.32a  |
| 11       | Silanediol, dimethyl-                                                         | 104.8±181.51b           | 4.9±4.34b   | -            | 606.56±260.51a | 409.24±33.54a | 3.72±0.00b   |
| 12       | 2-Ethyl-1-hexanol                                                             | 7.1±0.85c               | 4.34±0.72d  | 5.01±0.00d   | 8.61±1.14ab    | 7.45±0.14bc   | 8.75±0.00a   |
| 13       | 1-Nonanol                                                                     | -                       | 0.89±0.02b  | 1.87±0.49b   | 5.43±1.48b     | 4.15±1.21b    | 47.81±38.49a |
| 14       | 1-Dodecanol                                                                   | 9.05±1.37a              | 1.53±0.37a  | 10.4±15.78a  | 5.7±4.37a      | 2.21±0.46a    | 5.07±3.33a   |
| 15       | Cedrol                                                                        | -                       | 1.35±0.12c  | 1.42±0.06c   | 6.48±0.00a     | 2.69±0.00b    | 2.36±1.3bc   |
| 16       | Ethylene glycol - Adipate - Diethylene glycol                                 | 5.29±0.00a              | 2.86±0.02b  | 2.56±0.83b   | -              | 4.39±0.76a    | 2.75±0.00b   |
| 17       | Isobutanol, TBDMS derivative                                                  | 3.55±0.00ab             | -           | -            | 2.86±0.00b     | 3.72±1.05a    | -            |
| 18       | 1,6,10-Dodecatrien-3-ol, 3,7,11-trimethyl-, (E)-                              | 0.62±0.00bc             | 1.29±0.00ab | -            | 0.57±0.15bc    | 0.99±0.00b    | 2.09±1.16a   |
| 19       | Ledol                                                                         | 4.13±0.81b              | 3.05±0.38b  | 3.57±0.00b   | 2.49±0.11b     | 4.37±0.53b    | 9.09±2.7a    |

|           |                                                                            |               |                |              |               |                |              |
|-----------|----------------------------------------------------------------------------|---------------|----------------|--------------|---------------|----------------|--------------|
| 20        | Z-4-Dodecenol                                                              | -             | 5.1±0.00c      | 6.62±0.00c   | 7.79±0.00c    | 12.33±3.73b    | 20.92±0.00a  |
| 21        | Diethylene glycol, 2TMS derivative                                         | -             | 1.08±0.00b     | 1.04±0.12b   | 2.46±0.00a    | -              | 2.74±0.38a   |
| 22        | (5S,6R,7S,10R)-7-Isopropyl-2,10-dimethylspiro[4.5]dec-1-en-6-ol            | -             | 1.56±0.00b     | 1.43±0.77b   | 0.87±0b       | -              | 5.85±2.12a   |
| 23        | 1-Hexadecanol                                                              | -             | -              | 3.28±0.00    | -             | -              | 13.66±0.00   |
| 24        | 1-Hexanol                                                                  | -             | -              | -            | -             | 33.06±0.00     | -            |
| Esters    |                                                                            |               |                |              |               |                |              |
| 25        | 2,2,4-Trimethyl-1,3-pentanediol diisobutyrate                              | 5.06±0.27a    | 2.26±0.5a      | 2.46±1.63a   | 22.4±27.98a   | 8.32±3.78a     | 6.89±6.35a   |
| 26        | Propanoic acid, 2-methyl-, 3-hydroxy-2,2,4-trimethylpentyl ester           | 1.71±0.68bc   | 1.28±0.62c     | 2.3±0.46bc   | 6.44±3.61a    | 4.56±1.77abc   | 4.99±0.96ab  |
| 27        | Hexanoic acid, 3,5,5-trimethyl-, 2-ethylhexyl ester                        | 4.49±1.97b    | 4.8±2.05b      | 3.41±0.46b   | 3.5±1.00b     | 3.94±0.03b     | 10.59±4.09a  |
| 28        | 1,2-Benzenedicarboxylic acid, bis(2-methylpropyl) ester                    | 196.54±38.73a | 4.52±0.53b     | 9.39±8.46b   | 25±9.60b      | 21.37±12.55b   | 22.41±2.81b  |
| 29        | Dibutyl phthalate                                                          | 11.62±2.78ab  | 4.47±1.04b     | 9.23±8.42ab  | 8.91±2.43ab   | 23.8±17.3a     | 20.21±1.51ab |
| 30        | Methyl salicylate                                                          | 1.44±0.83b    | 1.75±0.31b     | 2.54±0.78b   | 2.08±0.72b    | 9.08±3.57a     | 3.64±0.89b   |
| 31        | Benzenepropanoic acid, 3,5-bis(1,1-dimethylethyl)-4-hydroxy-, methyl ester | 3.89±5.46a    | 4.22±2.23a     | 2.43±1.62a   | 3.69±0.94a    | 1.7±0.00a      | -            |
| 32        | 3-Methyl-2-(trimethylsilyl)oxybenzoic acidtrimethylsilyl ester             | 19.79±0.00a   | 13.7±0.00bc    | 9.24±0.00d   | 18.32±3.18a   | 16.89±2.68ab   | 10.66±0.00cd |
| 33        | Oxalic acid, isobutyl hexyl ester                                          | -             | -              | -            | -             | 187.27±142.61a | -            |
| Aldehydes |                                                                            |               |                |              |               |                |              |
| 34        | Octanal                                                                    | 2.11±0.44b    | 1.44±0.53b     | 5.02±2.77a   | 5.43±1.13a    | 2.3±0.72b      | 3.78±0.06ab  |
| 35        | 2,5-Dihydroxybenzaldehyde, 2TMS derivative                                 | 41.27±6.47bc  | 24.86±3.38c    | 29.05±10.69c | 54.68±11.49ab | 42.4±4.86abc   | 61.35±16.07a |
| 36        | Nonanal                                                                    | 12.17±3.01a   | 5.22±2.89a     | 13.7±13.66a  | 20.09±4.29a   | 14.51±6.58a    | 17.85±8.72a  |
| 37        | Decanal                                                                    | 7.58±2.4a     | 3.13±0.76a     | 11.77±15.25a | 10.92±3.04a   | 9.9±2.63a      | 10.39±4.31a  |
| 38        | Benzaldehyde, 2,4-dimethyl-                                                | 9.78±1.02b    | 213.63±122.08a | 76.48±57.75b | 47.37±17.07b  | 20.85±14.09b   | 35.51±13.08b |
| 39        | Dodecanal                                                                  | 1.73±0.34a    | 1.72±0.93a     | 2.33±1.33a   | 2.26±0.27a    | 2.57±0.42a     | 1.87±1.42a   |
| 40        | 3-Hydroxy-4-methoxybenzaldehyde, TBDMS                                     | 26.35±3.52b   | 16.58±1.81c    | 20.44±8.73bc | 35.87±0.00b   | 27.29±2.42b    | 26.34±3.34b  |
| 41        | Undecanal                                                                  | -             | -              | 4.89±0.00a   | -             | -              | 2.51±1.25b   |
| 42        | Benzeneacetaldehyde                                                        | 13.03±2.35a   | -              | 2.95±0.00d   | 10.1±0.00b    | -              | 5.82±0.00c   |
| 43        | Benzaldehyde                                                               | 7.27±2.85bc   | -              | 14.78±0.00a  | 9.1±0.00b     | 7.46±2.78bc    | 4.91±0.00c   |

|         |                                                                         |              |                 |                 |                 |                 |                 |
|---------|-------------------------------------------------------------------------|--------------|-----------------|-----------------|-----------------|-----------------|-----------------|
| 44      | 3,5-di-tert-Butyl-4-hydroxybenzaldehyde                                 | 1.29±0.19bc  | 1.01±0.00bc     | 1.01±0.00bc     | 2.83±1.49a      | 1.6±0.57ab      | -               |
| 45      | 2-Isopropylidene-3-methylhexa-3,5-dienal                                | -            | -               | 1.28±0.06b      | 2.17±0.00a      | -               | -               |
| 46      | Tetradecanal                                                            | -            | -               | 1.31±0.35a      | 1.12±0.6a       | -               | -               |
| 47      | Hexanal                                                                 | -            | -               | -               | 5.19±0.00       | -               | -               |
| Phenols |                                                                         |              |                 |                 |                 |                 |                 |
| 48      | 2,4-Di-tert-butylphenol                                                 | 1645.6±106ab | 1376.87±100.76b | 1258.82±170.79b | 1722.8±452.03ab | 1519.28±44.57ab | 2100.92±625.11a |
| 49      | 2-Methoxy-4-vinylphenol                                                 | -            | -               | -               | 21.3±10.5b      | -               | 56.96±24.51a    |
| 50      | 1,3,5-Benzetriol, 3TMS derivative                                       | 1.09±0.00c   | 0.58±0.00d      | -               | 5.94±0.00a      | 1.75±0.18b      | -               |
| Ketones |                                                                         |              |                 |                 |                 |                 |                 |
| 51      | Isophorone                                                              | 55.89±1.33a  | 19.75±8.8b      | 14.26±1.56b     | 26.47±1.18b     | 43.3±13.31a     | -               |
| 52      | 2,5-cyclohexadien-1-one, 2,6-bis(1,1-dimethylethyl)-4-hydroxy-4-methyl- | 5.84±1.09b   | 4.68±0.55b      | 4.56±0.64b      | 12.23±6.86a     | 7.35±0.67ab     | 5.44±0.00b      |
| 53      | 2,5-Cyclohexadiene-1,4-dione, 2,6-bis(1,1-dimethylethyl)-               | 2.2±1.29b    | 2.5±1.12ab      | 1.81±0.83b      | 5.32±1.85a      | 2.37±0.25b      | 3.63±2.04ab     |
| 54      | 7,9-Di-tert-butyl-1-oxaspiro(4,5)deca-6,9-diene-2,8-dione               | 11.41±2.53a  | 2.19±0.00a      | 4.96±0.00a      | 30.63±28.37a    | 29.99±26.52a    | -               |
| 55      | Cyclohexanone, 2-cyclohexylidene-                                       | 21.48±28.91a | 2.29±0.96a      | 9.57±7.74a      | 2.82±0.47a      | 2.85±0.42a      | 6.65±4.87a      |
| 56      | 2,2,6,7-Tetramethyl-10-oxatricyclo[4.3.0.1(1,7)]decan-5-one             | 0.71±0.00c   | 0.81±0.17c      | 1.27±0.34b      | 2.02±0.00a      | 1.37±0.16b      | 1.17±0.00b      |
| 57      | 5,9-Undecadien-2-one, 6,10-dimethyl-                                    | 2.71±0.84b   | -               | 0.9±0.00c       | 7.88±0.00a      | 3.8±1.71b       | 2.97±0b         |
| 58      | 5,9-Undecadien-2-one, 6,10-dimethyl-, (E)-                              | 2.38±0.00b   | 1.39±0.00bc     | 3.03±0.73b      | 5.91±2.12a      | 2.87±0.00b      | -               |
| 59      | 2,4,4-Trimethyl-3-(3-methylbutyl)cyclohex-2-enone                       | 0.6±0.00c    | -               | 1.03±0.00b      | 1.33±0.25a      | 1.47±0.00a      | -               |
| 60      | 2-Pentadecanone                                                         | 1.79±0.52b   | -               | -               | 0.49±0.00c      | 1.61±0.34b      | 2.39±0.00a      |
| 61      | Benzophenone                                                            | -            | -               | -               | 3.45±0.42c      | 6.00±0.00a      | 4.97±0.88b      |
| 62      | 2-Octanone                                                              | -            | -               | -               | -               | -               | 2.41±0.42a      |
| Others  |                                                                         |              |                 |                 |                 |                 |                 |
| 63      | Naphthalene                                                             | 1.55±0.71c   | 19.16±5.63ab    | 7.29±5.17bc     | 5.39±2.88bc     | -               | 32.14±16.63a    |
| 64      | 2-Hydrazino-4,6-dimethylpyrimidine, 3TMS derivative                     | 1.12±0.07a   | -               | 1.01±0.00a      | 1.42±0.64a      | 1.23±0.20a      | -               |
| 65      | Nordiazepam, tert-butyl dimethylsilyl derivative                        | 6.66±0.32ab  | 2.41±2.27bc     | 8.4±1.26a       | 7.95±6.01ab     | 5.03±1.52abc    | -               |
| 66      | Thymol                                                                  | 8.11±1.16a   | -               | -               | -               | -               | -               |

|       |                                            |                |             |            |                |                |              |
|-------|--------------------------------------------|----------------|-------------|------------|----------------|----------------|--------------|
| 67    | 1,4-Benzenediamine, N,N-diethyl-           | -              | -           | -          | -              | 20.41±18.74a   | -            |
| 68    | (-)-O-Acetylmalic anhydride                | -              | -           | -          | -              | 177.9±136.05a  | -            |
| 69    | .beta.-Myrcene                             | 1.13±0.26a     | -           | -          | 0.94±0.20a     | -              | -            |
| 70    | D-Limonene                                 | 50.89±18.9a    | 1.7±0.14b   | 1.88±1.08b | 48.49±23.84a   | 8.02±5.61b     | 2.47±0.00b   |
| 71    | Benzene, 2-ethyl-1,4-dimethyl-             | -              | 0.93±0.10b  | 0.65±0.00b | -              | -              | 3.87±2.16a   |
| 72    | Oxime-, methoxy-phenyl-                    | 78.78±136.45ab | 1.92±0.00b  | 0.48±0.00b | 351.93±364.19a | 182.62±27.38ab | -            |
| 73    | Benzene, pentamethyl-                      | 1.22±1.77b     | 1.09±1.03b  | 0.59±0.00b | -              | -              | 3.83±0.00a   |
| 74    | Ethylbenzene                               | -              | 4.91±0.98b  | -          | -              | -              | 7.06±2.38a   |
| 75    | o-Xylene                                   | -              | 42.99±0.00b | -          | -              | -              | 88.87±15.66a |
| 76    | Benzene, 1,2,4,5-tetramethyl-              | -              | 4.97±2.48b  | 2.98±1.98b | -              | -              | 25.06±20.17a |
| Acids |                                            |                |             |            |                |                |              |
| 77    | Heptadecane                                | 2.82±3.97bc    | 3.87±0.54b  | 1.97±1.7bc | 3.24±0.44bc    | -              | 7.84±0.04a   |
| 78    | 2,6-Dihydroxybenzoic acid, 3TMS derivative | -              | 2.31±0.98b  | -          | 3.71±0.21a     | 4.41±0.12a     | -            |
| 79    | 2,5-Dihydroxybenzoic acid, 3TMS derivative | 1.00±1.73b     | -           | -          | 1.9±0.36b      | 9.51±2.47a     | 7.7±0.00a    |
| 80    | Acetic acid                                | 1.09±1.89b     | -           | -          | 15.43±9.04a    | 2.45±0.00b     | -            |

-: not detected.

Different letters in same row indicate significant differences between groups ( $P < 0.05$ ).

**Table S2** Alpha diversity of the microbial community in sour bamboo shoots during the fermentation process.

|     | Chao1           | ACE             | Shannon     | Simpson    | Coverage |
|-----|-----------------|-----------------|-------------|------------|----------|
| 1d  | 353.54±18.48b   | 354.31±18.39b   | 4.86±0.24bc | 0.92±0.01a | 1.0      |
| 7d  | 638.04±130.02b  | 638.99±130.03b  | 4.61±0.35bc | 0.76±0.07b | 1.0      |
| 14d | 838.88±76.95b   | 840.25±77.06b   | 5.43±0.23ab | 0.92±0.01a | 1.0      |
| 21d | 1234.97±120.55a | 1237.11±120.63a | 6.26±0.13a  | 0.96±0.02a | 1.0      |
| 28d | 871.5±86.5b     | 871.61±86.61b   | 3.21±0.21c  | 0.62±0.02c | 1.0      |

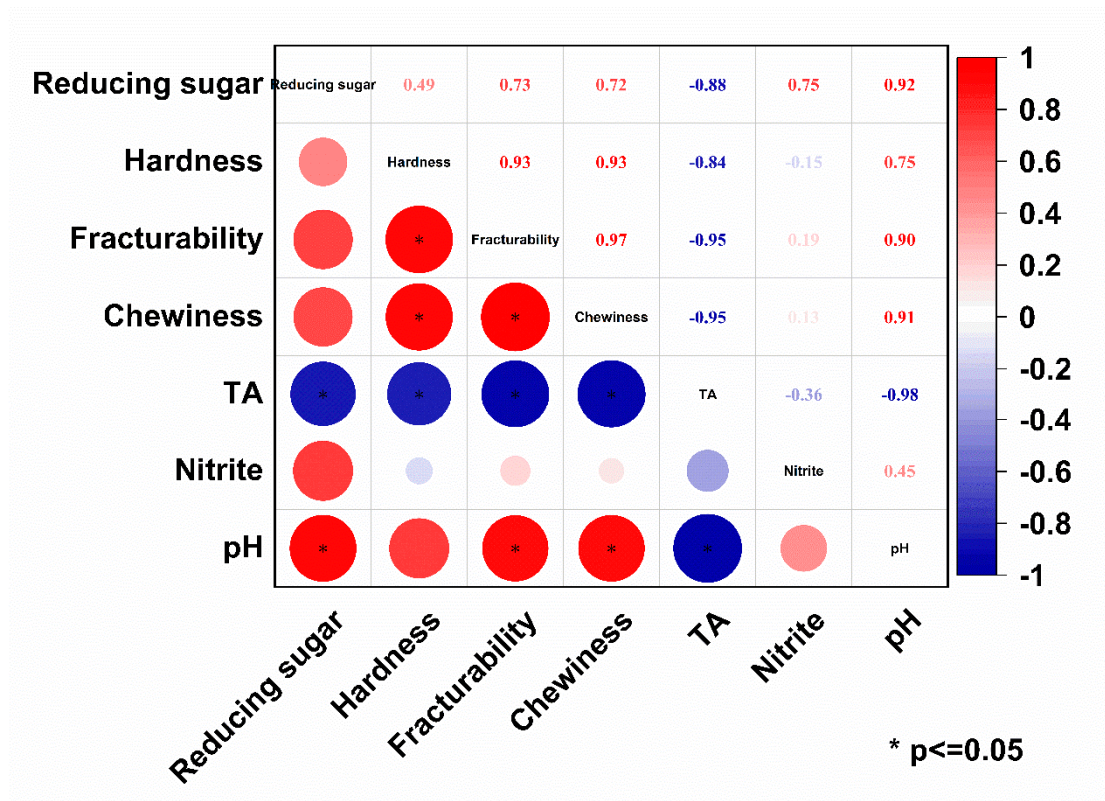

**Figure S1** Correlation among reducing sugar, hardness, fracturability, chewiness, TA, pH, and nitrite of sour bamboo shoots conducted by Pearson's correlation analysis. Circles represent a positive (orange) or negative (blue) correlation between the quality indicators. The size of the circle represents the levels of the correlation coefficient (r), \*  $P \leq 0.05$ ,

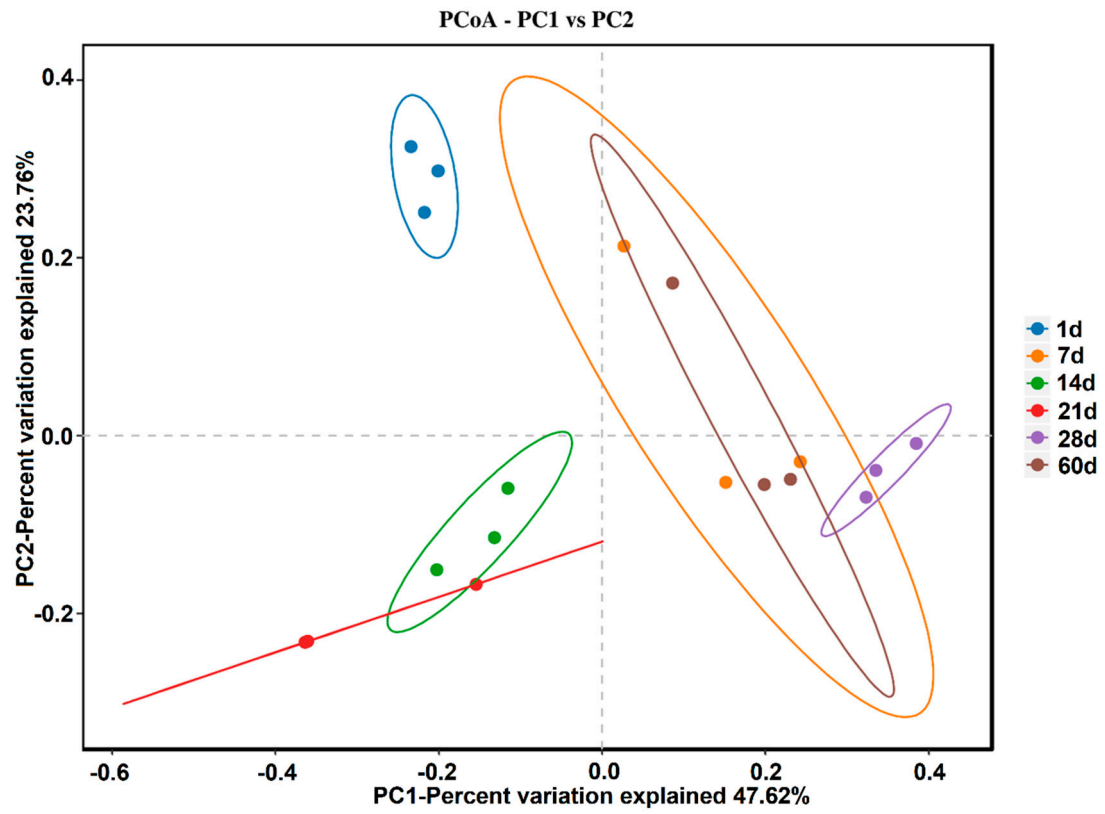

**Figure S2** PCoA analysis of the microbial community in sour bamboo shoots during fermentation process.

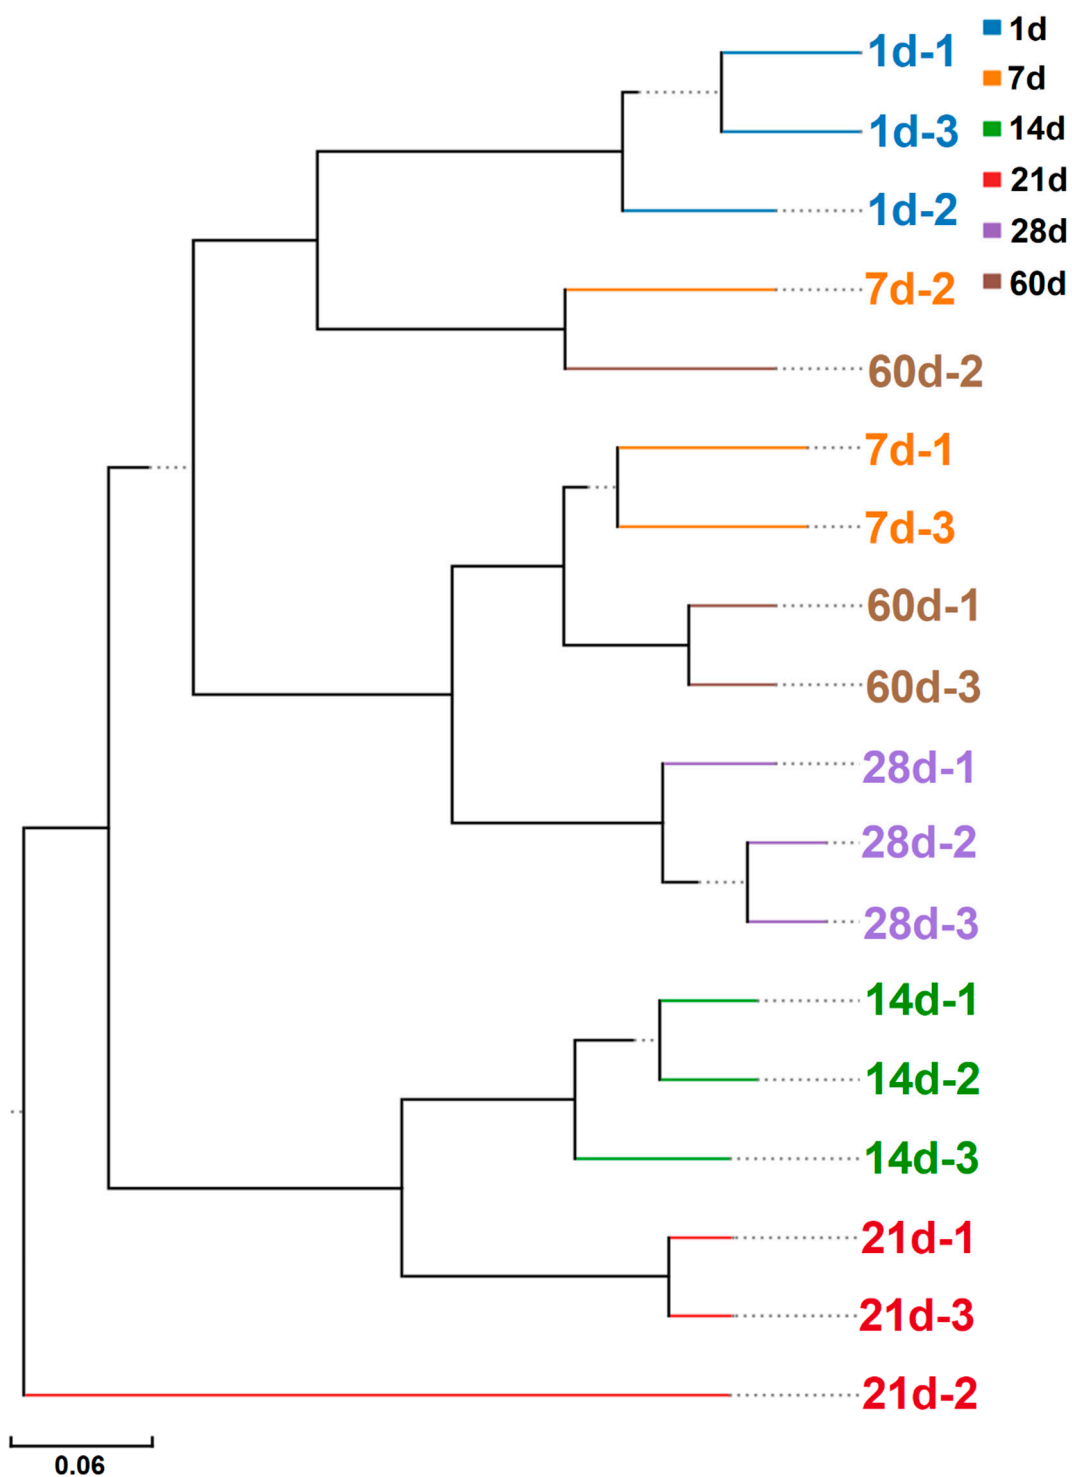

**Figure S3** UPGMA analysis of the microbial community in sour bamboo shoots during fermentation process.
